# Supplementary material
Source: Springer Nature journal article supplement (https://www.springermedizin.de/resource/supplementary/12889_2008_2056_MOESM5_ESM.pdf/9484444)

Length for age Z score

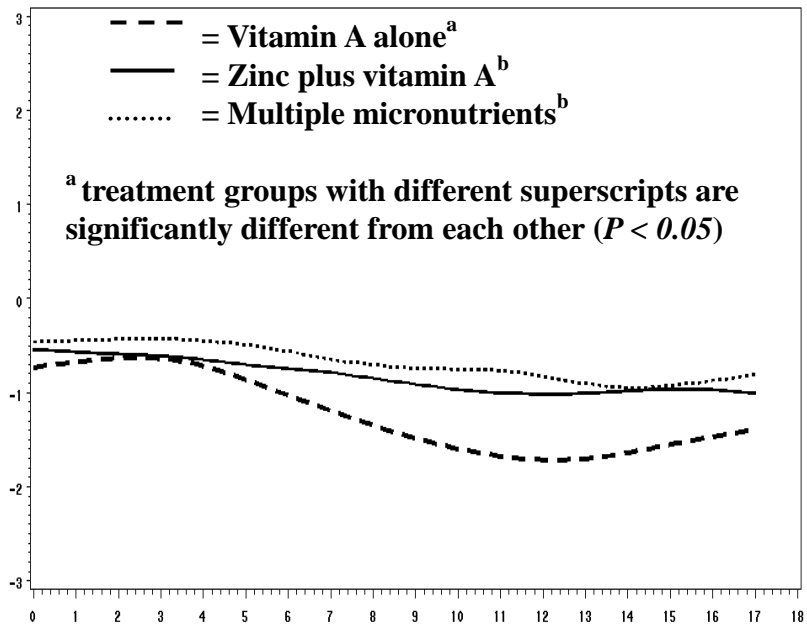

Months since treatment started

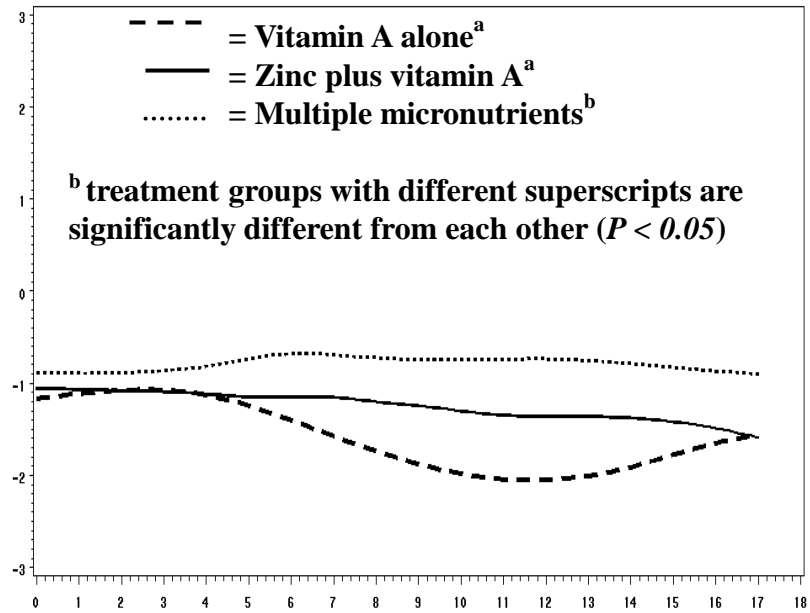

Supplement: MOESM5 [file 9484444]
